# Supplementary material
Source: Springer Nature journal article supplement (https://www.springermedizin.de/resource/supplementary/13058_2012_3350_MOESM1_ESM.pdf/9703910)
Supplement: MOESM1 [file 9703910]

**a**

|                 | <b>Ethanol-treated Group</b> |                     |                     |                     |                     | <b>Average</b> | <b>SD</b> |
|-----------------|------------------------------|---------------------|---------------------|---------------------|---------------------|----------------|-----------|
|                 | <b>1</b>                     | <b>2</b>            | <b>3</b>            | <b>4</b>            | <b>5</b>            |                |           |
|                 | <b>Length/Width</b>          | <b>Length/Width</b> | <b>Length/Width</b> | <b>Length/Width</b> | <b>Length/Width</b> |                |           |
| <b>0 day</b>    | 6.5/6.4                      | 6.9/6.3             | 6.9/6.6             | 6.8/6.3             | 7.0/5.9             | 135.42         | 10.16     |
| <b>7th day</b>  | 7.4/6.6                      | 7.1/6.5             | 7.3/7.0             | 7.0/6.5             | 7.7/6.6             | 161.12         | 12.82     |
| <b>14th day</b> | 7.8/7.0                      | 8.3/7.0             | 7.4/6.9             | 7.6/6.9             | 7.7/7.2             | 190.22         | 11.67     |
| <b>21th day</b> | 7.8/7.4                      | 8.8/7.4             | 8.1/7.6             | 8.1/7.2             | 8.3/7.5             | 230.75         | 12.00     |
| <b>28th day</b> | 9.0/8.1                      | 8.9/8.3             | 8.3/7.6             | 8.9/7.9             | 8.8/7.7             | 276.02         | 26.71     |
| <b>35th day</b> | 9.4/8.6                      | 9.4/8.5             | 8.6/8.0             | 9.4/8.0             | 9.0/8.3             | 314.64         | 29.48     |
| <b>42th day</b> | 9.9/8.8                      | 9.5/8.4             | 9.1/8.4             | 9.9/8.2             | 9.5/8.5             | 343.11         | 23.84     |
| <b>49th day</b> | 10.3/9.1                     | 9.7/9.0             | 9.6/8.7             | 9.7/8.6             | 9.9/8.9             | 386.69         | 27.29     |
| <b>56th day</b> | 10.2/9.8                     | 9.6/9.1             | 9.8/9.2             | 9.7/9.0             | 9.6/9.1             | 418.47         | 40.74     |

Measurement unit: millimeter

**b**

|                 | <b>Tam-treated Group</b> |                     |                     |                     |                     | <b>Average</b> | <b>SD</b> |
|-----------------|--------------------------|---------------------|---------------------|---------------------|---------------------|----------------|-----------|
|                 | <b>1</b>                 | <b>2</b>            | <b>3</b>            | <b>4</b>            | <b>5</b>            |                |           |
|                 | <b>Length/Width</b>      | <b>Length/Width</b> | <b>Length/Width</b> | <b>Length/Width</b> | <b>Length/Width</b> |                |           |
| <b>0 day</b>    | 7.1/6.5                  | 6.9/6.5             | 6.8/6.6             | 6.3/6.3             | 7.2/5.9             | 138.84         | 12.57     |
| <b>7th day</b>  | 7.5/6.9                  | 7.0/6.9             | 7.7/6.9             | 7.6/6.8             | 7.5/6.9             | 176.54         | 6.17      |
| <b>14th day</b> | 8.1/7.1                  | 7.5/7.2             | 8.1/7.4             | 7.5/7.0             | 8.0/7.3             | 205.78         | 16.02     |
| <b>21th day</b> | 8.8/8.0                  | 8.1/7.9             | 8.3/7.4             | 8.5/7.5             | 8.8/7.4             | 248.32         | 20.68     |
| <b>28th day</b> | 9.2/8.1                  | 8.7/8.1             | 8.9/7.9             | 9.1/8.1             | 9.3/8.1             | 293.71         | 11.65     |
| <b>35th day</b> | 9.6/8.7                  | 9.0/8.5             | 9.3/8.3             | 9.6/8.5             | 9.8/8.5             | 341.92         | 18.55     |
| <b>42th day</b> | 9.9/8.9                  | 9.4/9.1             | 9.7/8.9             | 9.6/8.7             | 10.4/8.4            | 379.14         | 13.18     |
| <b>49th day</b> | 10.4/9.2                 | 9.6/9.1             | 10.5/8.9            | 10.2/8.9            | 9.9/8.5             | 403.02         | 30.13     |
| <b>56th day</b> | 10.4/9.2                 | 9.6/9.1             | 10.5/10.1           | 10.2/9.1            | 10.0/9.0            | 440.11         | 55.89     |

Measurement unit: millimeter

**C**

|                 | <b>G15-treated Group</b> |                     |                     |                     |                     | <b>Average</b> | <b>SD</b> |
|-----------------|--------------------------|---------------------|---------------------|---------------------|---------------------|----------------|-----------|
|                 | <b>1</b>                 | <b>2</b>            | <b>3</b>            | <b>4</b>            | <b>5</b>            |                |           |
|                 | <b>Length/Width</b>      | <b>Length/Width</b> | <b>Length/Width</b> | <b>Length/Width</b> | <b>Length/Width</b> |                |           |
| <b>0 day</b>    | 6.7/6.6                  | 7.2/6.4             | 6.4/6.3             | 6.8/6.2             | 6.6/6.2             | 135.59         | 10.27     |
| <b>7th day</b>  | 6.9/7.0                  | 6.8/6.6             | 7.2/6.9             | 7.7/6.7             | 7.0/6.8             | 164.64         | 10.17     |
| <b>14th day</b> | 7.4/7.4                  | 7.3/7.2             | 7.7/7.3             | 7.7/6.9             | 7.5/7.0             | 192.81         | 10.42     |
| <b>21th day</b> | 7.9/7.8                  | 8.0/7.5             | 8.3/7.5             | 8.7/7.6             | 7.7/7.3             | 231.04         | 17.37     |
| <b>28th day</b> | 8.3/7.9                  | 8.7/8.0             | 8.5/7.9             | 8.9/8.1             | 8.4/7.8             | 270.03         | 15.05     |
| <b>35th day</b> | 8.9/8.3                  | 9.1/8.4             | 9.0/8.3             | 9.0/8.3             | 9.0/8.5             | 314.55         | 8.05      |
| <b>42th day</b> | 9.1/8.5                  | 9.0/8.5             | 9.5/8.7             | 9.3/8.4             | 9.6/8.8             | 342.64         | 21.46     |
| <b>49th day</b> | 9.8/8.9                  | 10.0/9.0            | 10.3/8.8            | 9.9/8.8             | 9.3/8.7             | 385.45         | 20.58     |
| <b>56th day</b> | 10.0/9.1                 | 10.2/9.0            | 10.5/9.0            | 9.9/8.9             | 9.3/9.0             | 404.23         | 19.53     |

Measurement unit: millimeter

d

|                 | <b>G15/Tam-treated Group</b> |                     |                     |                     |                     | <b>Average</b> | <b>SD</b> |
|-----------------|------------------------------|---------------------|---------------------|---------------------|---------------------|----------------|-----------|
|                 | <b>1</b>                     | <b>2</b>            | <b>3</b>            | <b>4</b>            | <b>5</b>            |                |           |
|                 | <b>Length/Width</b>          | <b>Length/Width</b> | <b>Length/Width</b> | <b>Length/Width</b> | <b>Length/Width</b> |                |           |
| <b>0 day</b>    | 7.4/6.2                      | 6.9/6.6             | 6.6/6.5             | 6.6/6.6             | 7.0/5.9             | 139.5          | 10.65     |
| <b>7th day</b>  | 7.9/6.8                      | 7.0/6.6             | 6.9/6.9             | 7.4/6.3             | 6.9/6.8             | 161.15         | 13.73     |
| <b>14th day</b> | 8.3/7.3                      | 7.3/6/8             | 7.4/7.3             | 7.9/6.7             | 7.5/7.3             | 192.85         | 20.55     |
| <b>21th day</b> | 8.3/7.7                      | 7.9/7.2             | 7.9/7.4             | 7.8/7.3             | 7.5/7.4             | 216.06         | 17.39     |
| <b>28th day</b> | 8.5/8.0                      | 8.0/7.3             | 8.1/7.6             | 8.0/7.5             | 7.7/7.5             | 232.13         | 23.7      |
| <b>35th day</b> | 7.9/7.3                      | 7.5/7.2             | 7.9/7.2             | 7.3/6.9             | 7.1/7.3             | 194.53         | 14.31     |
| <b>42th day</b> | 7.4/6.9                      | 7.0/6.6             | 7.3/6.5             | 7.3/6.5             | 6.9/6.7             | 158.39         | 9.98      |
| <b>49th day</b> | 7.1/6.3                      | 7.0/6.5             | 6.9/6.1             | 6.8/6.2             | 6.6/6.3             | 135.76         | 8.31      |
| <b>56th day</b> | 7.0/6.5                      | 6.8/6.7             | 6.7/6.1             | 6.6/6.4             | 6.5/6.0             | 135.46         | 15.05     |

Measurement unit: millimeter
